# Supplementary material for: An advanced biphasic porous and injectable scaffold displays a fine balance between mechanical strength and remodeling capabilities essential for cartilage regeneration
Source: Royal Society of Chemistry journal article supplement (doi:10.1039/d3bm00703k), 2023-01-01
Supplement: d3bm00703k1.pdf [file d3bm00703k1.pdf]

## Supporting Information

### Title

Advanced biphasic porous and injectable scaffold displays a fine balance between mechanical strength and remodeling capabilities essential for cartilage regeneration

Gabriela Zavala, Sergio M Viafara-García, Javier Novoa, Carmen Hidalgo, Ingrid Contardo, Paulo Díaz-Calderón, Wilfredo Alejandro González-Arriagada, Maroun Khoury, Juan Pablo Acevedo

Figure S1.

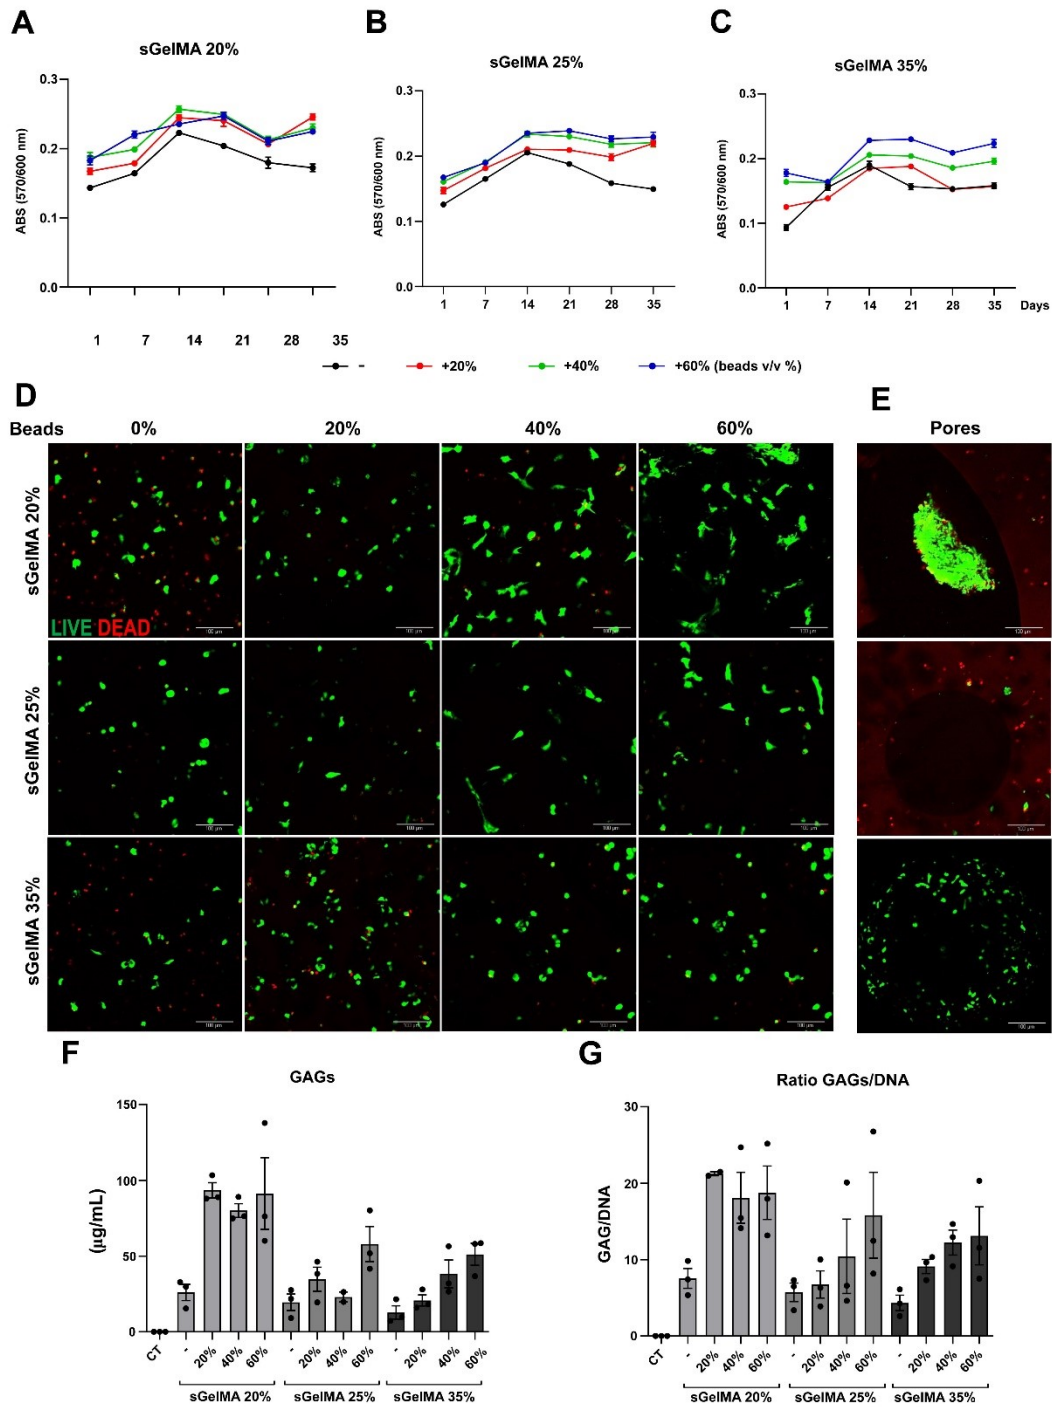

**Figure S1.** The metabolic activity of NHACK encapsulated in different sGelMA formulations was evaluated with PrestoBlue assay for 5 weeks. A) G20, B) G25, and C) G35 supplemented with 20, 40, and 60% of beads (v/v). D) Viability was evaluated in the same formulations with LIVE/DEAD staining, scale bar= 50  $\mu\text{m}$ . E) Representative images of pores after the differentiation protocol from LIVE/DEAD images, scale bar= 50  $\mu\text{m}$ . F) GAGs quantification after 5 weeks in all the formulations, (CT= empty hydrogels). G) GAGs normalized data concerning total DNA. n= 3 hydrogels for formulation.

Figure S2

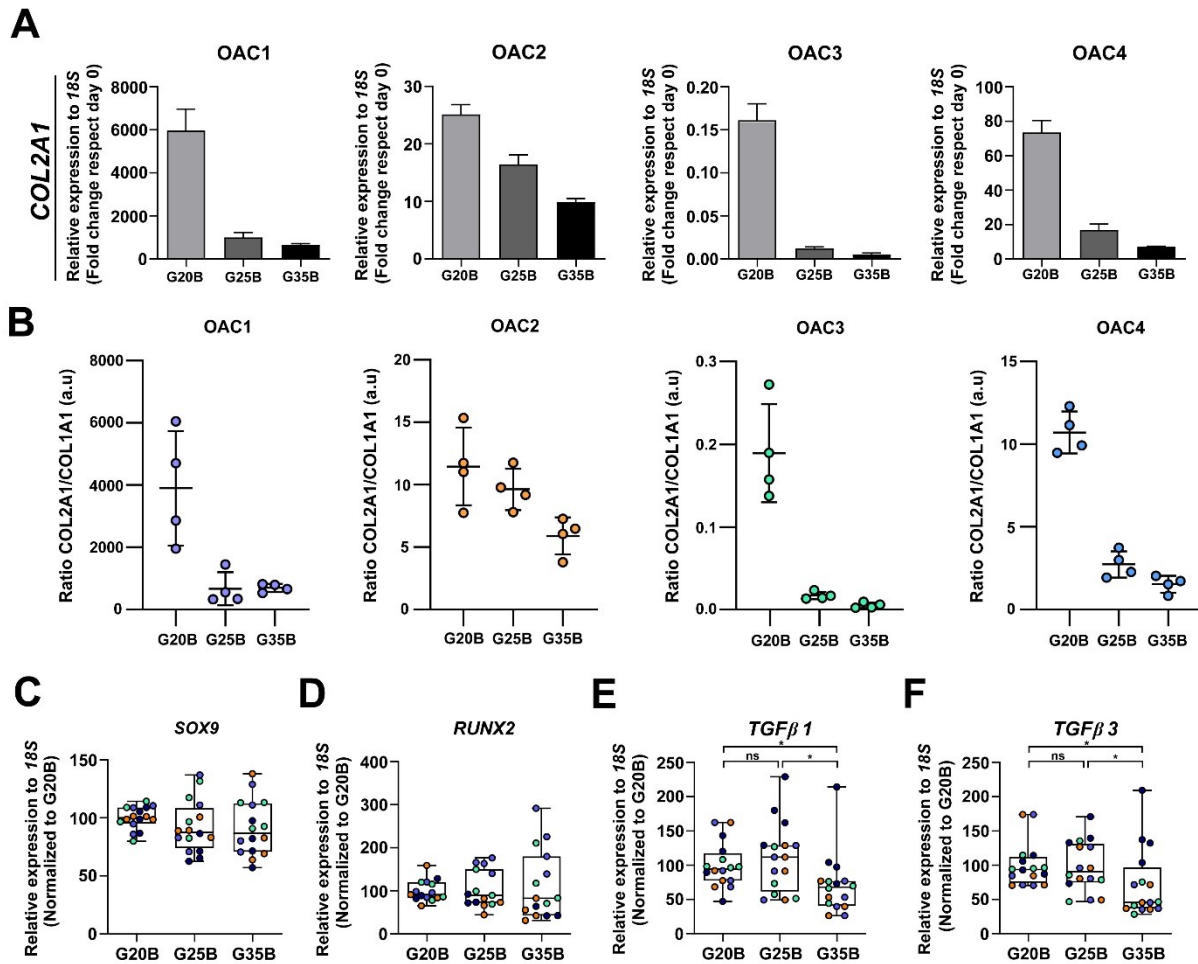

**Figure S2.** Expression of *COL2A1* in OACs isolated from different donors, fold-change is calculated concerning mRNA isolated from OACs at the moment of the encapsulation, *18S* was used as a housekeeping gene. Additionally, the ratio *COL2A1/COL1A1* is shown for each donor (B). Expression of genes of interest in G20B, G25B, and G35B, C) *SOX9*, D) *RUNX2*, E) *TGFβ1* and F) *TGFβ3*. n = 4 donors, n = 4 hydrogels per formulation. The data is shown as mean ± SEM and was analyzed with Kruskal-Wallis test and Dunn's multiple comparisons test, \*p < 0.05. The data was normalized relative to G20B.

Figure S3

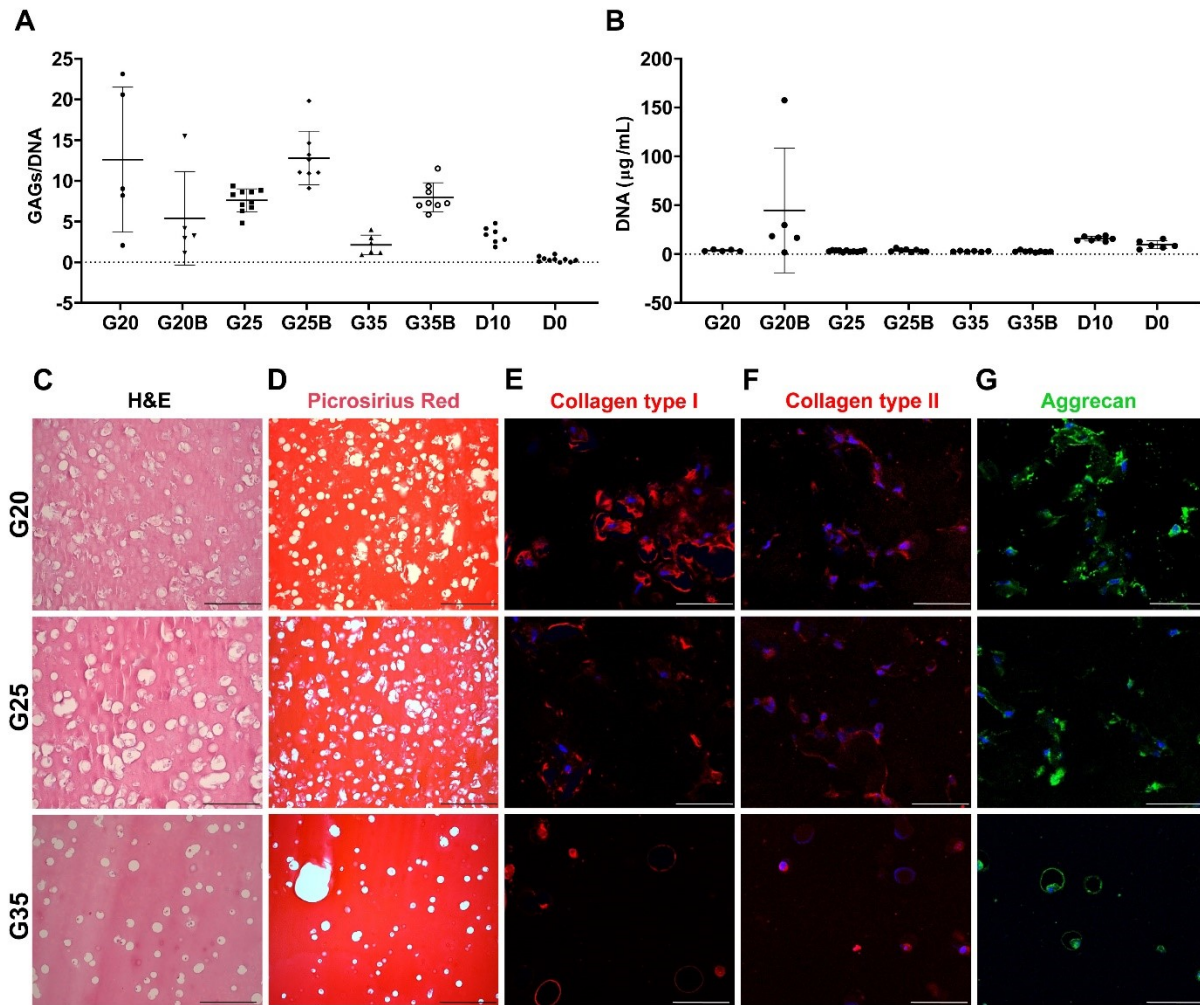

**Figure S3.** A) GAGs data normalized by total DNA in hydrogels recovered after the in vivo assay. B) Total DNA from hydrogels recovered after the assay. Histological analysis of the non-porous samples after the in vitro and in vivo differentiation: C) H&E, D) Picrosirius Red, E) Collagen type 1, F) Collagen type 2, G) Aggrecan, scale bar= 50 µm.

mRNA samples (day 35 relative to day 0), for all four OAC  
 normalized to their respective *I8S*.  
 ), n= 4 hydrogels for condition.

|  | OAC4 |              |              |              |             |
|--|------|--------------|--------------|--------------|-------------|
|  | G35B | G20B         | G25B         | G35B         |             |
|  | 13   | 0.78 ± 0.24  | 7.87 ± 2.10  | 6.44 ± 2.21  | 5.28 ± 1.68 |
|  | 01   | 0.01 ± 0.01  | 73.5 ± 19.4  | 16.9 ± 9.73  | 6.95 ± 1.48 |
|  | 04   | 0.08 ± 0.06  | 2.46 ± 0.86  | 0.73 ± 0.61  | 0.23 ± 0.03 |
|  | 18   | 0.81 ± 0.10  | 3.45 ± 0.51  | 2.46 ± 0.38  | 2.66 ± 0.58 |
|  | 64   | 12.3 ± 8.68  | 1.99 ± 0.22  | 2.75 ± 0.47  | 5.64 ± 3.10 |
|  |      | 1.84 ± 0.67  | 16.3 ± 5.10  | 8.17 ± 4.66  | 2.61 ± 0.88 |
|  |      | 0.36 ± 0.07  | 0.34 ± 0.10  | 0.54 ± 0.20  | 1.27 ± 0.30 |
|  |      | 3.09 ± 0.45  | 2.95 ± 0.88  | 1.90 ± 0.54  | 5.07 ± 0.63 |
|  |      | 21.7 ± 5.61  | 47.0 ± 19.9  | 88.2 ± 43.7  | 188 ± 57.1  |
|  |      | 4.33 ± 1.73  | 4.12 ± 1.40  | 2.12 ± 0.87  | 2.09 ± 0.29 |
|  |      | 5.98 ± 2.80  | 5.26 ± 1.84  | 2.83 ± 1.06  | 1.94 ± 0.38 |
|  |      | 8.44 ± 0.98  | 12.0 ± 2.37  | 9.90 ± 3.17  | 55.7 ± 18.4 |
|  |      | 2.24 ± 0.14  | 2.36 ± 0.34  | 1.77 ± 0.61  | 1.12 ± 0.29 |
|  |      | 0.93 ± 0.11  | 1.07 ± 0.22  | 1.01 ± 0.39  | 0.90 ± 0.19 |
|  |      | 6.15 ± 1.48  | 6.23 ± 1.57  | 5.69 ± 2.64  | 6.80 ± 2.35 |
|  |      | 31.5 ± 8.55  | 42.8 ± 8.82  | 47.5 ± 5.16  | 30.2 ± 6.68 |
|  |      | 89.8 ± 33.8  | 229 ± 54.8   | 150 ± 56.4   | 117 ± 106   |
|  |      | 60.8 ± 25.3  | 63.9 ± 16.7  | 84.9 ± 46.9  | 400 ± 190   |
|  |      | 1.21 ± 0.36  | 1.23 ± 0.47  | 1.46 ± 0.72  | 19.7 ± 5.24 |
|  |      | 0.18 ± 0.04  | 0.16 ± 0.07  | 0.13 ± 0.03  | 1.64 ± 0.48 |
|  |      | 9.69 ± 4.68  | 8.58 ± 2.29  | 4.67 ± 2.25  | 4.09 ± 1.10 |
|  |      | 202 ± 127    | 157 ± 63.4   | 282 ± 131    | 255 ± 78.1  |
|  |      | 4.33 ± 1.73  | 4.12 ± 1.40  | 2.12 ± 0.87  | 2.09 ± 0.29 |
|  |      | 5.98 ± 2.80  | 5.26 ± 1.84  | 2.83 ± 1.06  | 1.68 ± 0.69 |
|  |      | 30.0 ± 6.42  | 22.16 ± 4.22 | 21.0 ± 3.37  | 64.2 ± 16.8 |
|  |      | 3.84 ± 1.60  | 4.75 ± 1.26  | 3.99 ± 1.25  | 0.92 ± 0.19 |
|  |      | 1.75 ± 0.84  | 1.88 ± 0.72  | 0.98 ± 0.29  | 1.11 ± 0.45 |
|  |      | 30.2 ± 15.5  | 34.5 ± 14.5  | 20.9 ± 4.19  | 6.47 ± 1.83 |
|  |      | 26.6 ± 6.95  | 70.7 ± 17.6  | 193 ± 98.06  | 227 ± 63.0  |
|  |      | 23.6 ± 7.51  | 415 ± 98.2   | 4604 ± 4734  | 455 ± 117   |
|  |      | 359 ± 171    | 316 ± 67.6   | 369 ± 318    | 2732 ± 1235 |
|  |      | 9.04 ± 3.55  | 6.01 ± 1.76  | 4.80 ± 2.00  | 3827 ± 2078 |
|  |      | 0.98 ± 0.28  | 0.98 ± 0.28  | 0.98 ± 0.28  | 886 ± 402   |
|  |      | 2.14 ± 0.26  | 2.14 ± 0.26  | 2.14 ± 0.26  | 787 ± 337   |
|  |      | 1.76 ± 44.6  | 1.76 ± 44.6  | 1.76 ± 44.6  | 886 ± 402   |
|  |      | 1.19 ± 0.27  | 1.19 ± 0.27  | 1.19 ± 0.27  | 886 ± 402   |
|  |      | 1.97 ± 0.84  | 1.97 ± 0.84  | 1.97 ± 0.84  | 886 ± 402   |
|  |      | 11.2 ± 1.04  | 11.2 ± 1.04  | 11.2 ± 1.04  | 886 ± 402   |
|  |      | 0.30 ± 0.08  | 0.30 ± 0.08  | 0.30 ± 0.08  | 886 ± 402   |
|  |      | 0.21 ± 0.04  | 0.21 ± 0.04  | 0.21 ± 0.04  | 886 ± 402   |
|  |      | 3.53 ± 0.95  | 3.53 ± 0.95  | 3.53 ± 0.95  | 886 ± 402   |
|  |      | 33.5 ± 8.69  | 33.5 ± 8.69  | 33.5 ± 8.69  | 886 ± 402   |
|  |      | 488 ± 196    | 488 ± 196    | 488 ± 196    | 886 ± 402   |
|  |      | 79.1 ± 18.16 | 79.1 ± 18.16 | 79.1 ± 18.16 | 886 ± 402   |
|  |      | 2.04 ± 0.89  | 2.04 ± 0.89  | 2.04 ± 0.89  | 886 ± 402   |
|  |      | 1.57 ± 0.24  | 1.57 ± 0.24  | 1.57 ± 0.24  | 886 ± 402   |
|  |      | 0.95 ± 0.16  | 0.95 ± 0.16  | 0.95 ± 0.16  | 886 ± 402   |
